# Supplementary material for: Developmental function and state transitions of a gene expression oscillator in Caenorhabditis elegans
Source: PubMed Central journal article supplement (PMC7370751; doi:10.15252/msb.20209498), 2020-07-20
Supplement: MSB-16-e9498-s002.pdf [file MSB-16-e9498-s002.pdf]

## Expanded View Figures

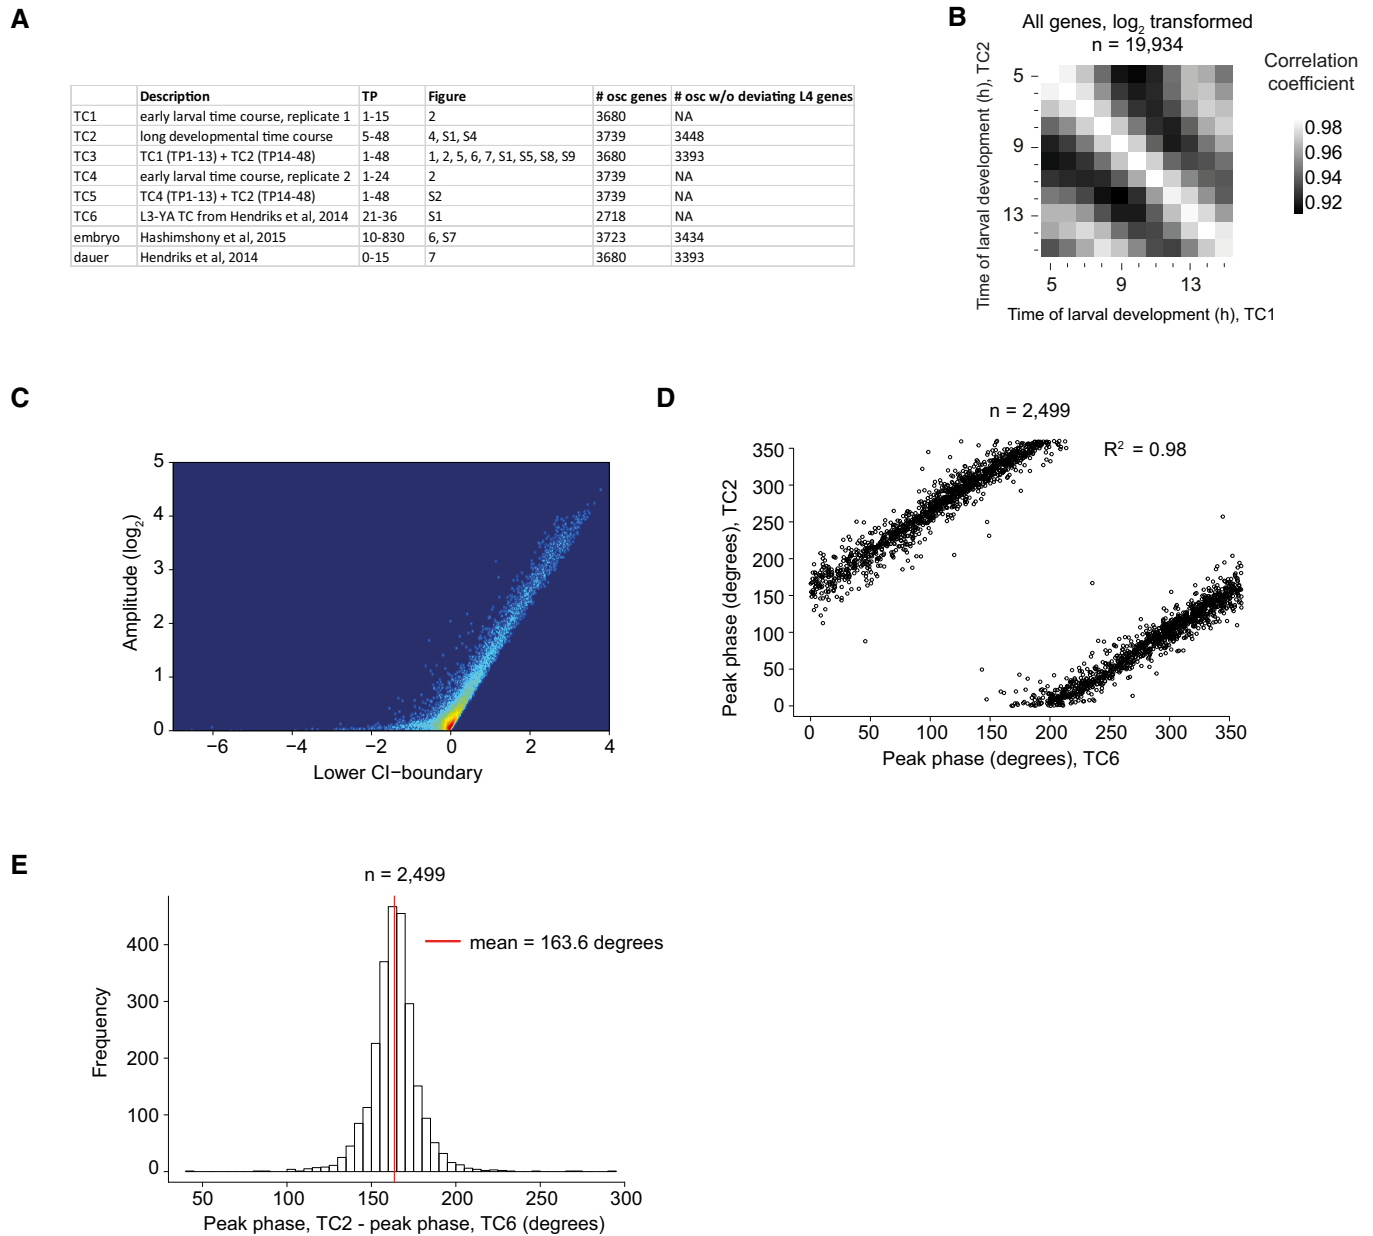

**Figure EV1. Identification of 3,739 “oscillating” genes.**

- A Overview of time courses in this study.
- B Pairwise correlation of  $\log_2$ -transformed count data ( $n = 19,934$ ) of the early time course (TC1) with the long developmental time course (TC2). High correlation is detected for samples that correspond to the same time points, justifying a fusion of these time courses to one continuous full developmental time course (TC3).
- C Smooth scatter of amplitude over lower boundary of 99% confidence interval of the amplitude as determined by cosine fitting and error propagation (see Materials and Methods, related to Fig 1B).
- D, E Scatterplot (D) of the peak phase of the long developmental time course (TC2) described here over the previously published L3-YA time course (TC6) (Hendriks et al, 2014). Genes that were identified as “oscillating” in both time courses ( $n = 2,499$ ) are shown. Peak phases correlate well as confirmed by the coefficient of determination,  $R^2$ , as indicated. However, they differ systematically (E) because a peak phase of  $0^\circ$  is arbitrarily chosen. A red vertical line indicates the mean phase difference (TC2 – TC6; corrected for circularity as described in Materials and Methods). Note that the gene-specific peak phase calculated here and previously both also differ from the arbitrarily assigned cycle phases in Appendix Fig S7 and their discussion.

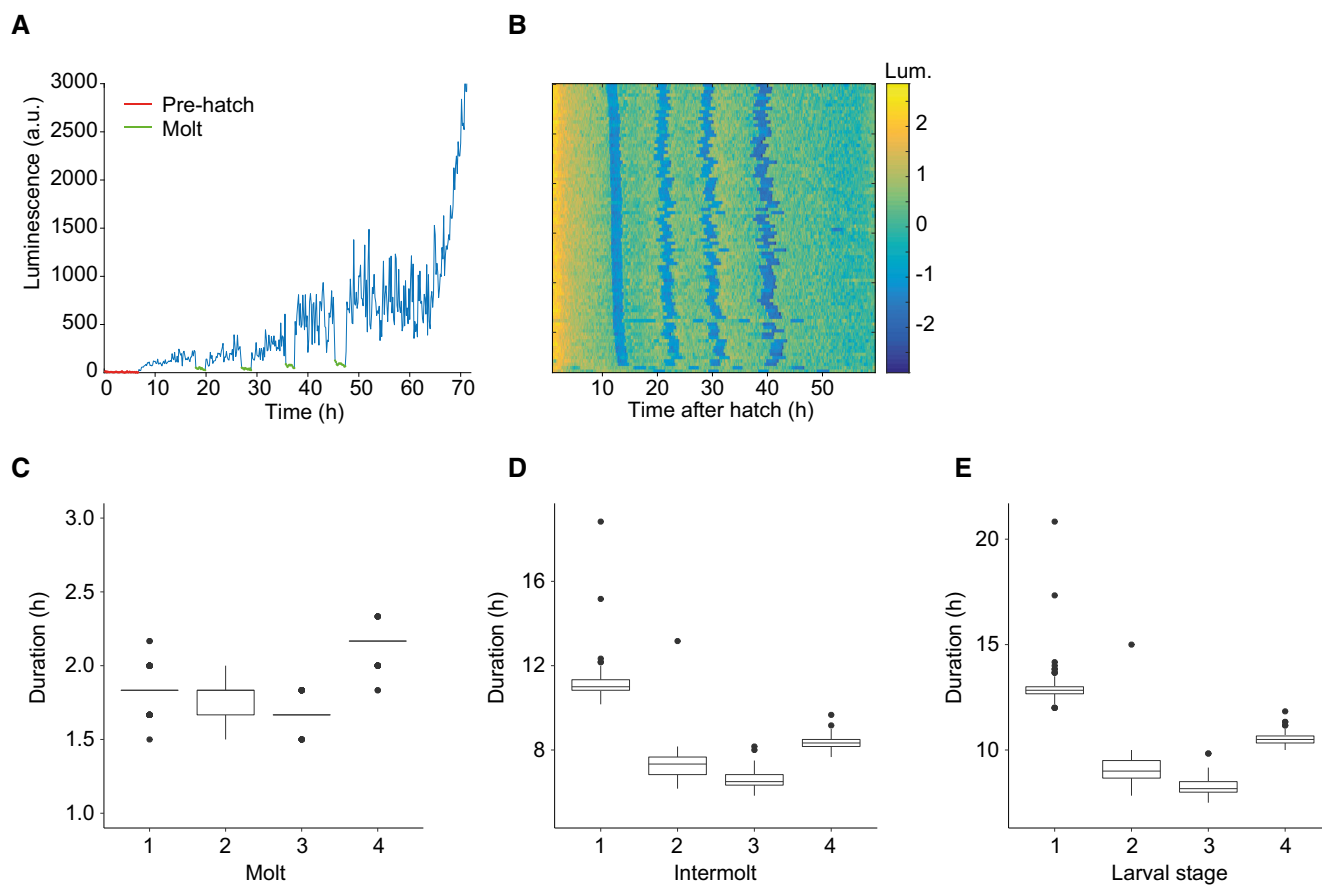

**Figure EV2. Quantification of stage durations reveals extended intermolt 1, intermolt 4, and molt 4.**

**A** Representative raw luminescence traces of individual animal (HW1939) grown at 20°C. As the egg-shell is impenetrable to luciferin, a sudden increase in luminescence at the beginning of the time course indicates hatch (pre-hatch in red). Abrupt drops and subsequent rises in luminescence specify molts (in green).

**B** Heatmap showing trend-corrected luminescence (Lum.) trace for one animal per horizontal line ( $n = 86$ ). Hatch is set to  $t = 0$  h, and traces are sorted by time of entry into first molt. Blue indicates low luminescence and corresponds to the molts.

**C–E** Quantification of the duration of each molt (**C**), intermolt (**D**), and larval stage (**E**) in hours for HW1939 animals ( $n = 86$ ).

Data information: Boxplots in (**C–E**) extend from first to third quartile with a line at the median, outliers are indicated with a dot, and whiskers show  $1.5 \times \text{IQR}$ .

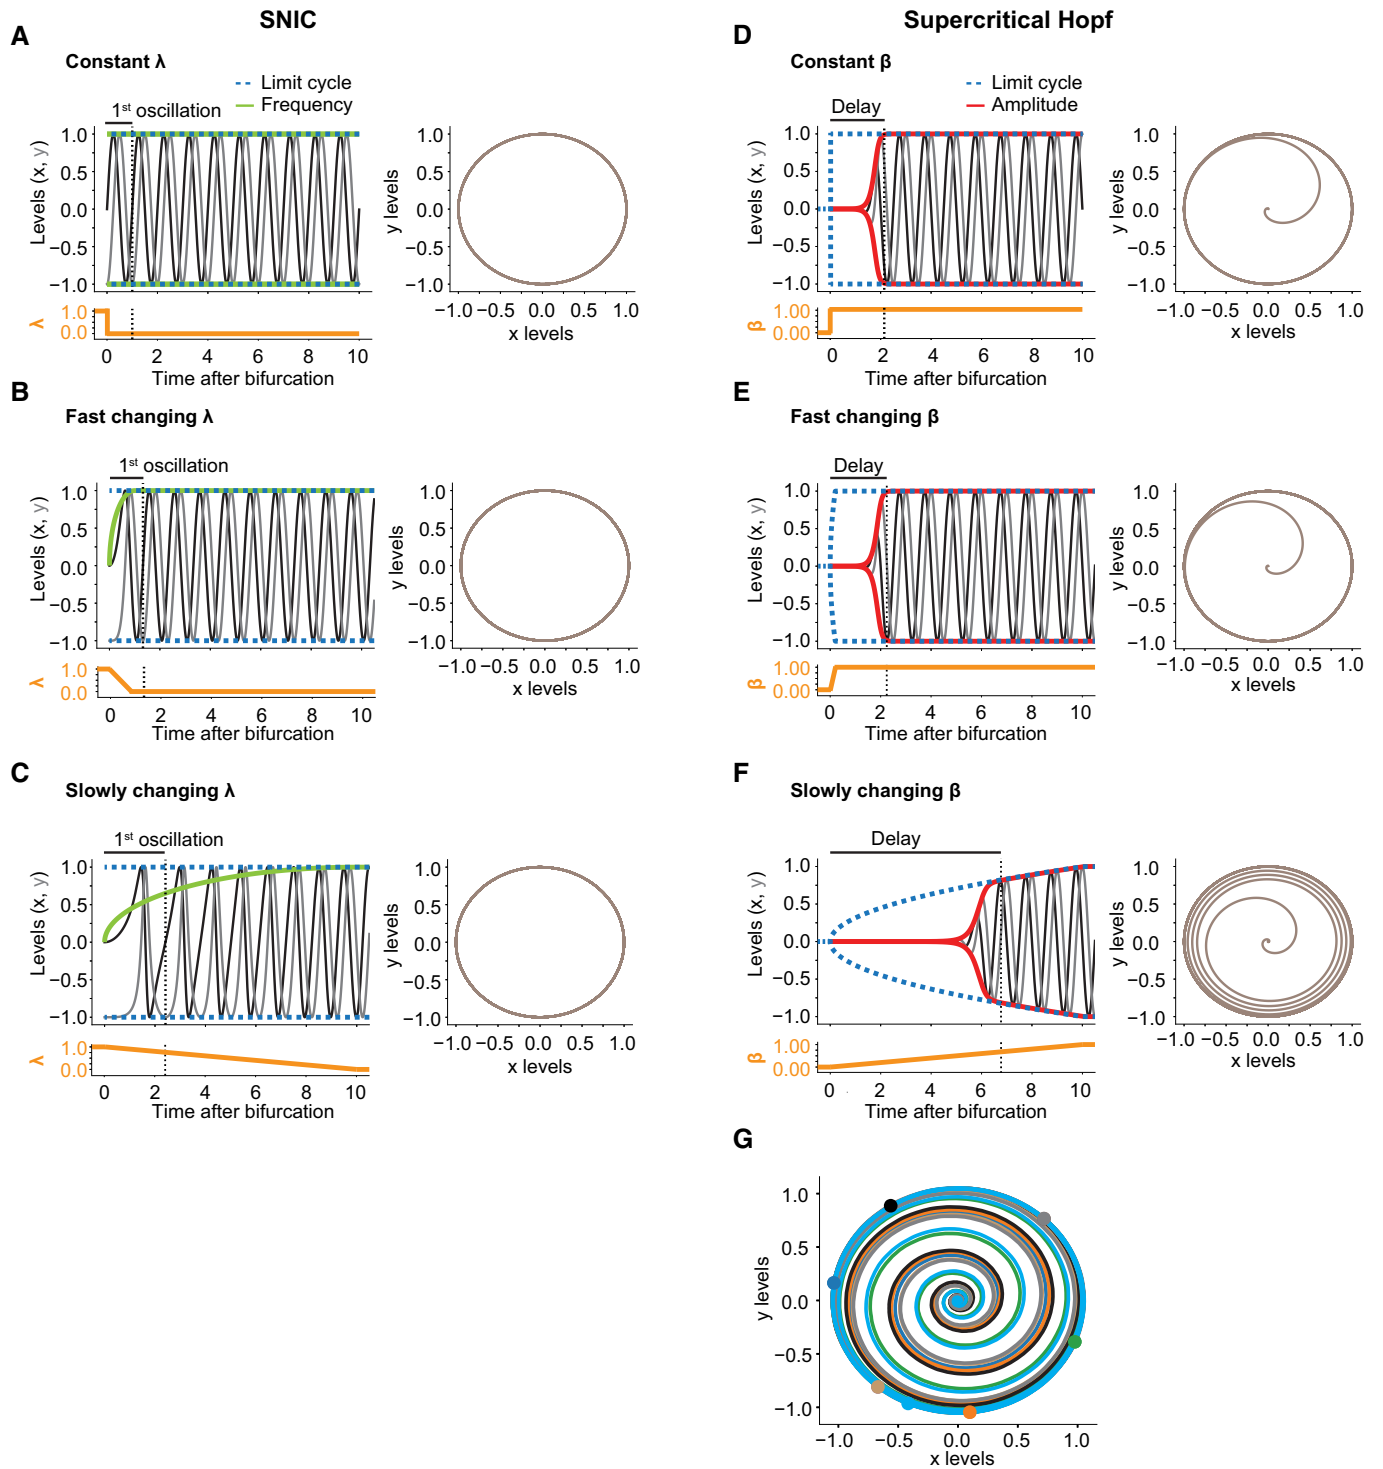

Figure EV3.

**Figure EV3. Simulations of different bifurcation dynamics for the supercritical Hopf and SNIC bifurcations, respectively.**

Simulations were performed for different dynamics of the parameter value using the model described in Materials and Methods. The resulting limit cycle is indicated in blue, the frequency for the SNIC bifurcations in green and the amplitude for the supercritical Hopf bifurcation in red. The change in the respective bifurcation parameter is indicated in the separate plot below in orange.

- A–C SNIC bifurcations with their oscillatory behaviors upon instantaneous change to a constant value of  $\lambda$  (A), fast dynamic increase of  $\lambda$  (B), or slowly changing  $\lambda$  (C). The time to complete one oscillation is indicated on the top and in the dotted line, and the oscillatory behavior in the phase space is represented on the right.
- D–F Supercritical Hopf bifurcations and resulting oscillatory behaviors upon instantaneous change to a constant value of  $\beta$  (D), fast dynamic increase of  $\beta$  (E), or slowly changing  $\beta$  (F). The delay indicates the time until the amplitude approaches the limit cycle, and the resulting oscillatory behavior is represented in the phase space on the right.
- G Stochastic simulations of a supercritical Hopf bifurcation after an instantaneous change to a constant value of  $\beta$  displayed in the phase space. Each iteration had the same initial conditions ( $x_0 = 0, y_0 = 0$ , constant  $\beta = 1$ ) and additive white noise. The colored dots represent phase at which the individual oscillations reached the limit cycle.

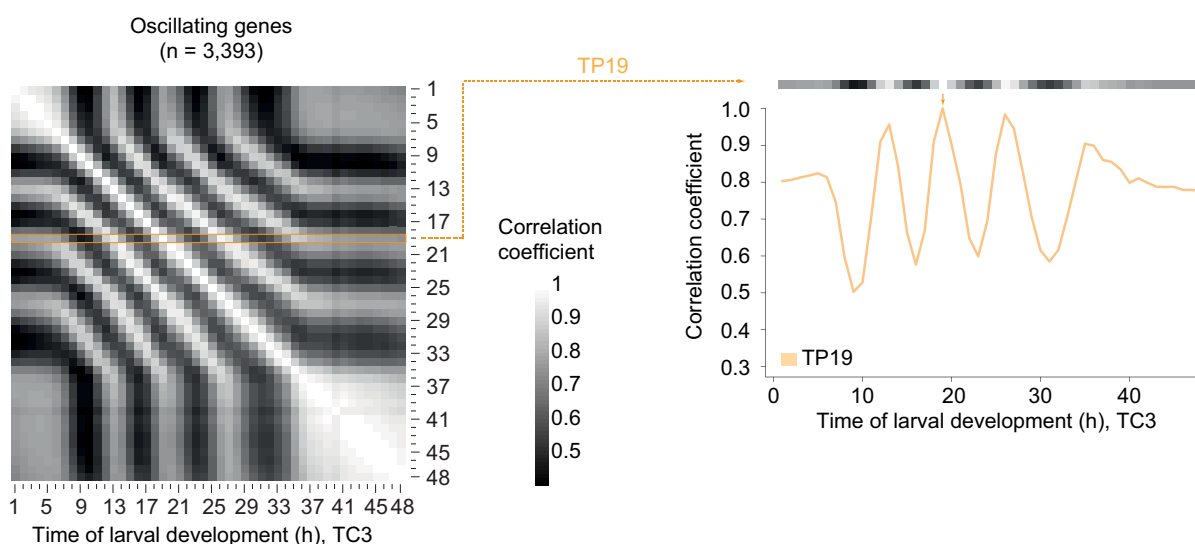

**Figure EV4. Correlation line explanation.**

Left: Pairwise correlation plot of  $\log_2$ -transformed oscillatory gene expression patterns without L4 deviating genes obtained from synchronized population of L1 stage larvae at 25°C (TC1, TP1 – 13) combined time points from the long developmental time course (TC2, TP14 – 48), as in Fig 5B ( $n = 3,393$ ). Right: The correlation of TP19 versus all other time points is plotted as a line (orange), and correlation with itself at 19 h is 1.0 (orange arrow).
